# Supplementary material
Source: ML conference proceedings conference paper supplement (https://openreview.net/forum?id=44pUhNb083)

# ① Pipeline setup

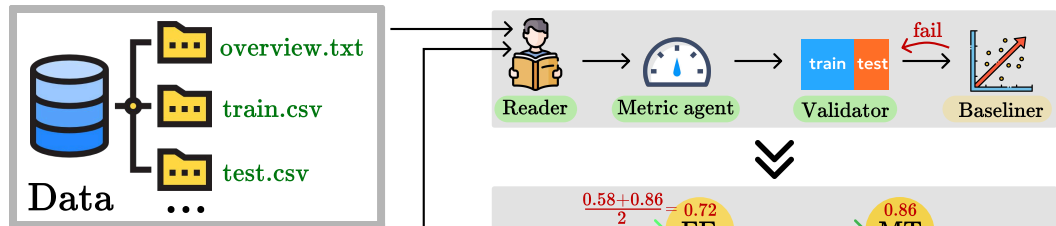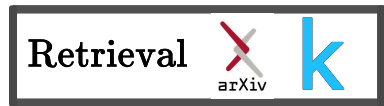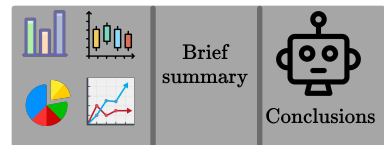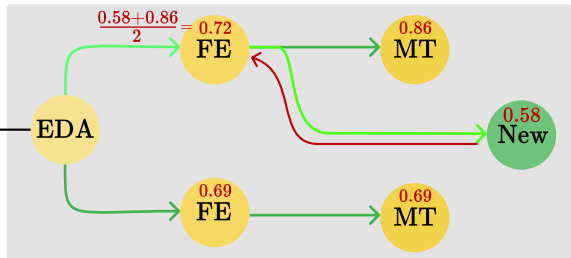

# ② Tree initialization

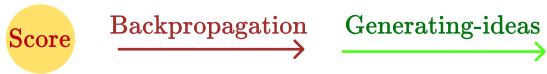

# ③ Main loop

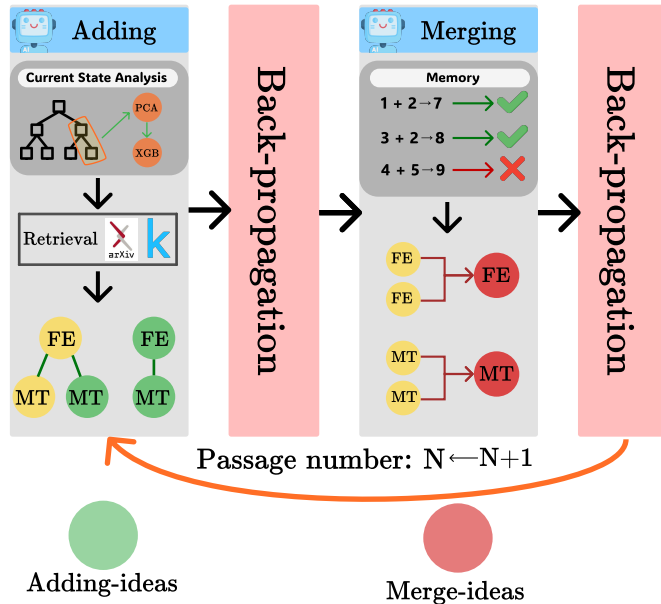

Supplement: supplementary_material [file pipeline.pdf › 9023_KompeteAI_Accelerated_Aut_Supplementary Material/source/pipeline.pdf]
